# Supplementary material
Source: PubMed Central journal article supplement (PMC1863491)
Supplement: pnas_0702230104_2.pdf [file pnas_0702230104_2.pdf]

### A L5 ventral Root Axon Number

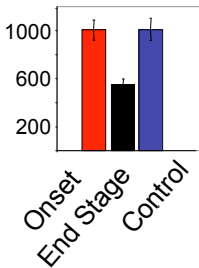

### C Innervation at the Gastrocnemius Muscle

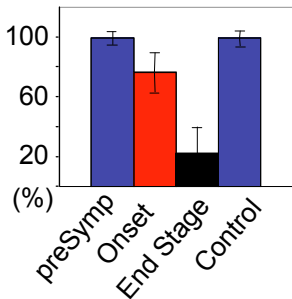

### B L5 ventral Root Axonal Caliber Distribution

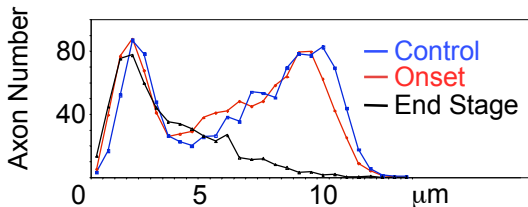

Mutant SOD1<sup>G85R</sup> Mice
